# Supplementary material for: Zeb1 controls neuron differentiation and germinal zone exit by a mesenchymal-epithelial-like transition
Source: eLife. 2016 May 14;5:e12717. doi: 10.7554/eLife.12717 (PMC4891180; doi:10.7554/eLife.12717)
Supplement: Supplementary file 1. — A fold change filtering was performed from three independent experiments using 2-ΔΔCt (where ΔΔCT=ΔCT of FACS sorted Zeb1 overexpressing GNPs–ΔCT of control GNPs) and is represented as tables. The threshold for cut off was a fold change ≥ +2.0 or ≤ -2.0. Supplementary Table 1A: Functional gene grouping shows an upregulation in expression of several genes such as Anhak, Col3A1, Gng11, MMP2 and3, Serpine (Pals-1) and Vim all of which are documented to be highly expressed during EMT. Supplementary Table 1B: Reciprocal expression of several key genes that are also downregulated during EMT included Dsp, Fgfbp1, Mst1r. Additionally Krt14, Nodal and Sox10 genes that are involved in differentiation showed a reduced expression when Zeb1 was overexpressed. DOI: http://dx.doi.org/10.7554/eLife.12717.036 [file elife-12717-supp1.xls]

## Sheet: Supplemental File 1A
Table S1: List of genes that are upregulated more than 2 fold based on a pathway focused EMT RT2-PCR Profiler Array.
Description	Symbol	Fold Up Regulation	Functional roles
AHNAK nucleoprotein (desmoyokin)	Ahnak	2.2	Up regulated in EMT
Collagen, type III, alpha 1	Col3a1	4.57	Up regulated in EMT , Signaling pathway : Integrin mediated , differentiation & development , Extracellular matrix & cell adhesion
Guanine nucleotide binding protein (G protein), gamma 11	Gng11	2.58	Up regulated in EMT, Signaling pathway : G protein Coupled Receptor
Integrin alpha 5 (fibronectin receptor alpha)	Itga5	3.05	Up regulated in EMT, Extracellular matrix & cell adhesion, Signaling pathway : Integrin mediated
Matrix metallopeptidase 2	Mmp2	2.45	Up regulated in EMT, Extracellular matrix & cell adhesion
Matrix metallopeptidase 3	Mmp3	4.02	Up regulated in EMT, Extracellular matrix & cell adhesion
Moesin	Msn	2.11	Up regulated in EMT, Migration and Motility
Serine (or cysteine) peptidase inhibitor, clade E, member 1	Serpine1	2.04	Up regulated during EMT, Extracellular matrix & cell adhesion
Tissue factor pathway inhibitor 2	Tfpi2	5.45	Down regulated during EMT
Transforming growth factor, beta 1	Tgfb1	2.41	Morphogenesis , Cell growth & Proliferation, Extracellular matrix & cell adhesion, Signaling Pathway: TGF b/BMP
Vimentin	Vim	2	Up regulated during EMT, Migration and Motility, Cytoskeleton

## Sheet: Supplemental File 1B
Table S2: List of genes that are downregulated more than 2 fold based on a pathway focused EMT RT2-PCR Profiler Array.
Description	Symbol	Fold Down Regulation	Functional roles
Desmocollin 2	Dsc2	-22.92	Extracellular matrix & cell adhesion
Desmoplakin	Dsp	-4.66	Down regulated in EMT, Differentiation & Development
V-erb-b2 erythroblastic leukemia viral oncogene homolog 3 (avian)	Erbb3	-5.28	Cell growth and proliferation,Signaling pathway: Receptor Tyrosine Kinase
Estrogen receptor 1 (alpha)	Esr1	-3.88	Signaling pathway: Estrogen Receptor, transcription factor
Fibroblast growth factor binding protein 1	Fgfbp1	-21.63	Down regulated in EMT, Cell growth and proliferation
Interleukin 1 receptor antagonist	Il1rn	-11.49	Down regulated in EMT
Keratin 14	Krt14	-14.58	Differentiation & Development,
Macrophage stimulating 1 receptor (c-met-related tyrosine kinase)	Mst1r	-5.04	Down regulated in EMT, Differentiation & Development,Cell growth and proliferation, Migration and Motility,
Nodal	Nodal	-4.74	Differentiation & Development, ,Cell growth and proliferation,Migration and Motility,
Pleckstrin 2	Plek2	-6.1	Cytoskeleton,
SRY-box containing gene 10	Sox10	-2.37	Differentiation & Development, Morphogenesis , Transcription Factor
