# Supplementary material for: Zeb1 controls neuron differentiation and germinal zone exit by a mesenchymal-epithelial-like transition
Source: eLife. 2016 May 14;5:e12717. doi: 10.7554/eLife.12717 (PMC4891180; doi:10.7554/eLife.12717)
Supplement: Supplementary file 2. — (A) Neurite length and Ki67 or p27 labeling data from Figure 5. (B) Average migration distance and EdU labeling data from Figure 6 DOI: http://dx.doi.org/10.7554/eLife.12717.037 [file elife-12717-supp2.xlsx]

## Sheet: Supplemental File 2A-Figure 5
		Neurite length			Ki67 positive			P27 negative
		av distance	sd	T test vs Zeb1	Av % positive	sd	T test vs Control	Av % positive	sd	T test vs Zeb1
	Control	115.433	17.6684	0.00428262	16.269	3.07627		20.517	8.792	4.67595e-07
	Zeb1	55.213	2.58461		45.5215	5.38728	6.58435e-11	55.3182	3.38022
Zeb1 +	Pard6a	104.063	16.0782	0.00653518	15.7151	4.91231	0.818218	23.5152	3.01522	0.000133834
	Pard3A	76.1124	1.43277	0.0116269	33.9683	7.6354	0.0501855	25.855	0.825477	4.35908e-10
	Jam/Nec	66.4327	10.0552	0.134551	32.5369	3.36971	0.00406835	22.3475	9.63795	0.0235333
	Chl1	124.341	1.83284	0.000134125	12.5979	3.12795	0.104738	19.3297	10.8877	1.63994e-11
	Lin7a	72.7779	8.87566	0.105102	35.6642	9.37457	0.000172607	46.9345	3.13151	0.00363646
	Dlg2	62.5825	0.909571	0.0617656	30.0539	3.39647	0.00698326	24.1854	2.92338	0.000108499
	Sorl1	68.3982	5.92035	0.109768	28.8974	6.01838	0.0576204	21.2156	4.21097	0.00119949
	Bhlhe40	89.8048	3.16316	0.166433	28.4498	1.08891	1.83799e-06	24.1896	3.54986	0.000542011
	Cdh1	71.3265	18.2932	0.205393	22.2777	4.55678	0.135536	38.0545	9.92965	0.0895691
	Nfib	78.7146	8.76371	0.0112023	45.6674	20.9474	0.00111436	25.2902	2.07546	5.74909e-08
	Flt1	85.7382	12.1871	0.0132221	22.8466	4.18688	0.094576	30.9116	8.29342	0.0306962
	Cdk5r1	65.2552	8.62113	0.125443	43.9559	25.4119	0.0121025	29.0744	2.81265	0.000148463

## Sheet: Supplemental File 2B-Figure 6
		Migration			Edu staining
		av distance	sd	T test vs con	Av % positive	sd	T test vs Zeb
	Control	74.0364	8.32847		3.33417	0.436523	0.000893367
	Zeb1	42.3559	7.61948	6.44274e-05	10.8732	0.114445
Zeb1 +	Pard6a	79.7513	5.19712	0.125108	2.7285	0.850835	0.00275467
	Pard3A	73.9169	4.50969	0.489937	2.88198	0.91661	0.00330733
	Jam/Nec	71.6888	5.50143	0.32453	2.9376	0.86135	0.0029707
	Chl1	79.7411	6.89353	0.171234	4.59574	1.42731	0.012521
	Lin7a	67.2247	12.0754	0.224495	5.14184	0.462699	0.00172016
	Dlg2	58.2619	11.3468	0.0591954	3.04049	0.735291	0.00224133
	Sorl1	52.6714	0.560296	0.00221602	6.40118	1.95957	0.0421627
	Bhlhe40	57.4312	10.7835	0.0470977	7.33227	1.46928	0.0383854
	Cdh1	41.2524	10.7381	0.00726227	5.33611	1.6986	0.0220799
	Nfib	46.6859	9.65303	0.00834357	4.23889	1.06332	0.00637262
	Flt1	52.8995	3.19875	0.00142472	7.95798	2.77078	0.13773
	Cdk5r1	61.0787	4.0282	0.0129814	7.40235	1.89223	0.0611859
