# Supplementary material for: Zeb1 controls neuron differentiation and germinal zone exit by a mesenchymal-epithelial-like transition
Source: eLife. 2016 May 14;5:e12717. doi: 10.7554/eLife.12717 (PMC4891180; doi:10.7554/eLife.12717)
Supplement: Supplementary file 3. — (A) List of primers used for RT-PCR in microarray validation and developmental profile expression analysis. (B) Primer Sequences used for validating the ChIP -PCR studies. (C) List of Antibodies. DOI: http://dx.doi.org/10.7554/eLife.12717.038 [file elife-12717-supp3.xls]

## Sheet: Supplemental File 3A
Table 2A: Sequences of primers used for real-time PCR assays.
Gene ID	Primer	Sequence (5′ to 3′)
NM_011546.2	zeb1 F	AGACTATTCTGATTCCCCAAGTG
	zeb1 R	CCTTCTGAGCTAGTGTCTTGTC
NM_001047435	Par6α F	AGGTGATGTTAGCGGATTCAG
	Par6α R	TTAATGTTCACCAGACTGAGAGG
NM_033620	Par3 F	TGCCCAAGTAAAGAAACCTCG
	Par3 R	GTCTTCCACATCCTCATCCTG
NM_008860.3	aPKC F	CCCTTCCTGGTTGGCTTACAC
	aPKC R	GACATACTCGATGACCAGGAACAA
NM_009864	Cdh1 F	GGCTGGCTGAAAGTGACACA
	Cdh1 R	ACGGCATGAGAATAGAGGATGTACT
X00686.1	18S F	AGTAACGGAGCCAGACCTGAGA
	18S R	CTTTGAGGTGGAAGACACAGGAG
NM_001033223.2	Lin7a F	GCCGCTTACTCTGGACAG
	Lin7a R	TTGATACACCTCTCGGATTGC
NM_011807.3	dlg2 F	CTTATGGGCCACCGGATATTAC
	dlg2 R	CATGTGCTTGGGAATTGGTG
NM_001029988.2	FAT2 F	TCAGCATCAACCAAGACACAG
	FAT2 R	GCTAACACCGTCAACCAGTAG
NM_011436.3	SORL1 F	ACAAGGAGTGCGATGAGTTC
	SORL1 R	AGTAACGGGAACAGTTTGGG
NM_001257715.1	CDK5R1 F	ACGGGTCATCGTCCAGGCGT
	CDK5R1 R	GCACCGGCGGCAGAGAAACT
NM_010718.4	LIMK2 F	ACCAAGAAACGCACCTTACG
	LIMK2 R	ACAGAGAACGATCCCAAAAGAG
NM_001286127.1	NFIB F	GCCTGAGAAGCCACTGTTTAG
	NFIB R	GGTGGAGTTCGAGTTGAGATG
NM_011498.4	Bhlhe40 F	CTCCTACCCGAACATCTCAAAC
	Bhlhe40 R	CTGCAGGGCAATGATTTTCTG
NM_007697.2	Chl1 F	ACTCTCCGTTCAACAGGTTC
	Chl1 R	GGCTTATCGTCCTTAGTCCATG
NM_001029988.2	FAT2 F	CACTTCACCATCGACCCTAAG
	FAT2 R	ACCACTTCAACAGCCACTTC
NM_010228.3	Flt1 F	GAGCCAGGAACATATACACAGG
	Flt1 R	GCTTGACAGTCTAAGGTCGTAG
NM_011427	Snail1 F	ACATCCGAAGCCACACG
	Snail1 R	GTCAGCAAAAGCACGGTTG
NM_011415	Snail2 F	ACACATTAGAACTCACACTGGG
	Snail2 R	TGGAGAAGGTTTTGGAGCAG
NM_011658	Twist F	CCGGAGACCTAGATGTCATTGTT
	Twist R	AGTTATCCAGCTCCAGAGTCTCTAGAC

## Sheet: Supplemental File 3B
Table 2B: Primer sequences for RT-PCR confirmation of ChIP hits enriched by Zeb1 antibody.
ZEB1 F	ATTCTCCGCTACTCCACCAC
ZEB1 R	GCCGGAACCTTGTTGCTA
AR F	GCGTGGTTGCTCCCGCAAGT
AR R	GGGTAGACCCTTCCCAGCCC
PARD6 F	CCCTTGACGTCATGGTTTGGG
PARD6 R	GGGACAGTGCCCCACAG
LIMK2 F	TGGGAGTCCTGGACCCAAAAT
LIMK2 R	TGAGGCTCCCTAGAGCAGAT
CDH F	GCCCCATGCCACCAAC
CDH R	CTGATTGGCTGGGGACGC
LIN7A F	CTCCATCTGGCTACCAACCC
LIN7A R	AGCATCAGCAACCGCTTGTA
CHL INTRON F	TGGCACTTCAATCAAAGACCAT
CHL INTRON R	TTCATTGCCAGTGGCTGGAT
PARD3A F	GAGACGCCGAACAGGTG
PARD3A R	CCGGCTACCATGTCCAG
GAPDH F	GGTGCAGGCTCAGCACTT
GAPDH R	CTCATTGAGTCCCAGCTGCC

## Sheet: Supplemental File 2C
Table 2C: List of antibodies used for IF, ChIP, and western blotting.
Antibody	Company	Host species	Working Dilution
CHL	R&D systems	GOAT	1:300
Anti-C-myc	Roche	Mouse	1:600
Tuj1	R&D Systems	Mouse	1:1000
GFP IgG	Invitrogen	Rabbit	1:7500
Ki67	BD Biosciences	Mouse	1:100
Math-1/Atoh-1	Abcam	Rabbit	1:50
Meis1/2 (C-17)	Santa Cruz	Goat	1:100
Pard6a(G-9)	Santa Cruz	Mouse	1:50
TAG1-s (4D7)	DSHB	Mouse	1:50
Zeb1/AREB6	Sigma	Rabbit	1:600
p27	Cell Signaling	Mouse	1:100
Sortilin	ABCAM	Rabbit	1:700
lin7a	ABCAM	Rabbit	1:600
DLG2/pysn-110 clone N18/28	UC Davis/NIH NeuroMab	Mouse	1:2500
P35/25 (C64B10)	Cell Signaling	Rabbit	1:50
Siah-2(24E6H3)	Santa Cruz	Mouse	1:100
