# Supplementary figures and images for: Zeb1 controls neuron differentiation and germinal zone exit by a mesenchymal-epithelial-like transition
Source: eLife journal article supplement (doi:10.7554/elife.12717), 2016-05-10

Centrin2-Venus (transfection marker)/Chl1

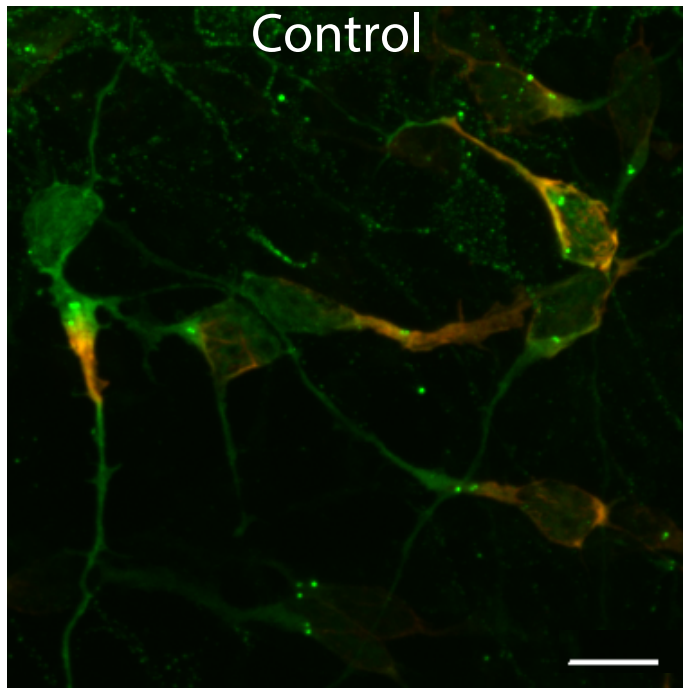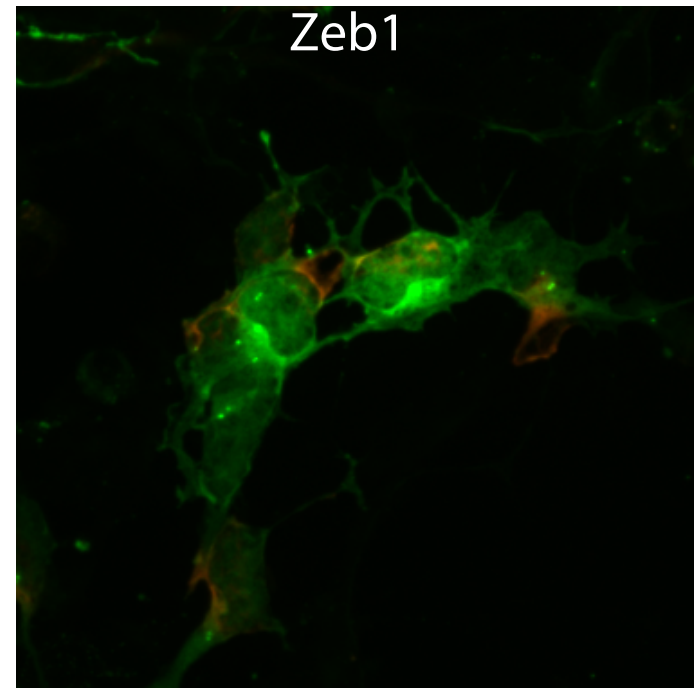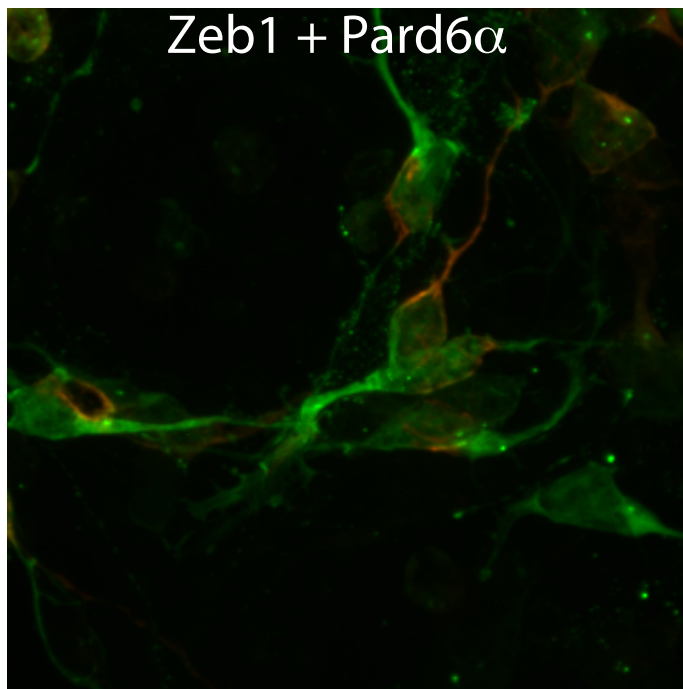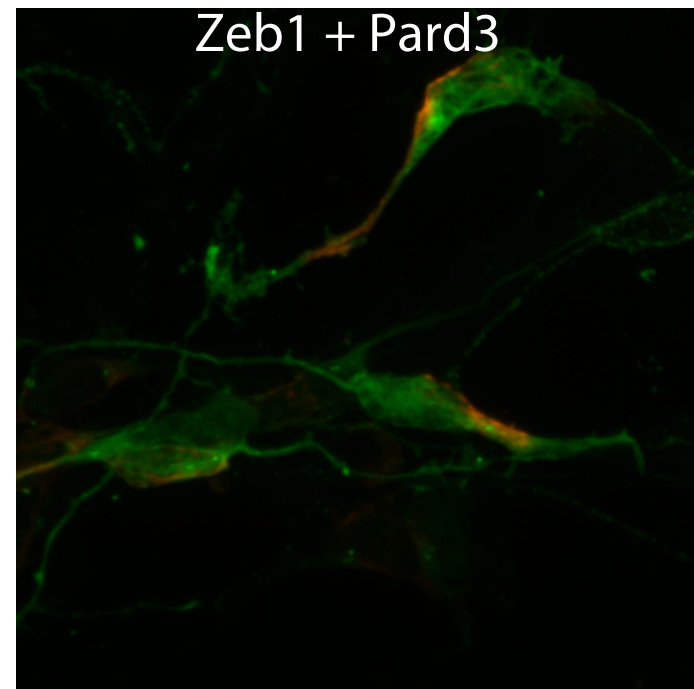

Supplement: supp [file elife-12717-supp-v1.zip]

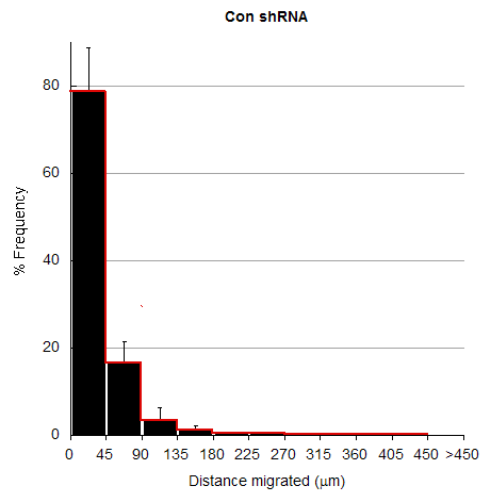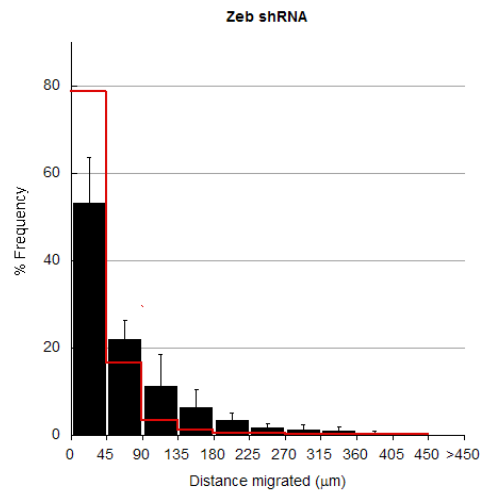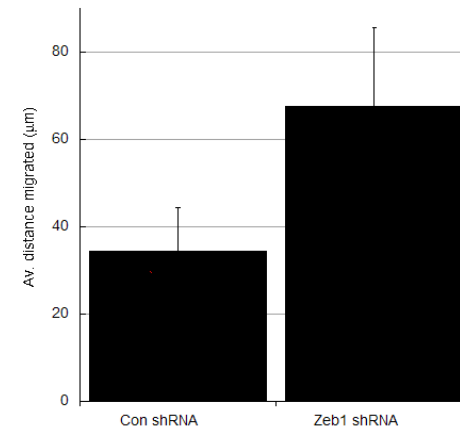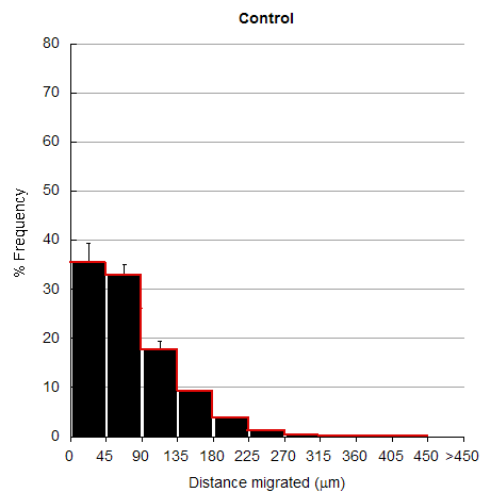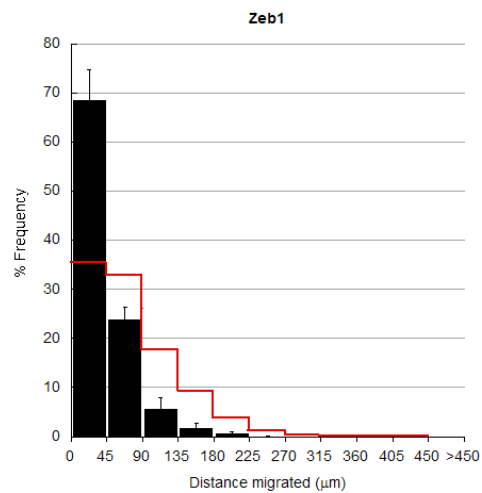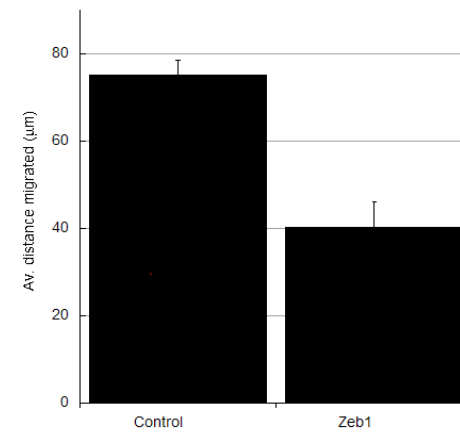

**Singh et al. Figure 2 Supplement 1**

Supplement: supp [file elife-12717-supp-v1.zip]

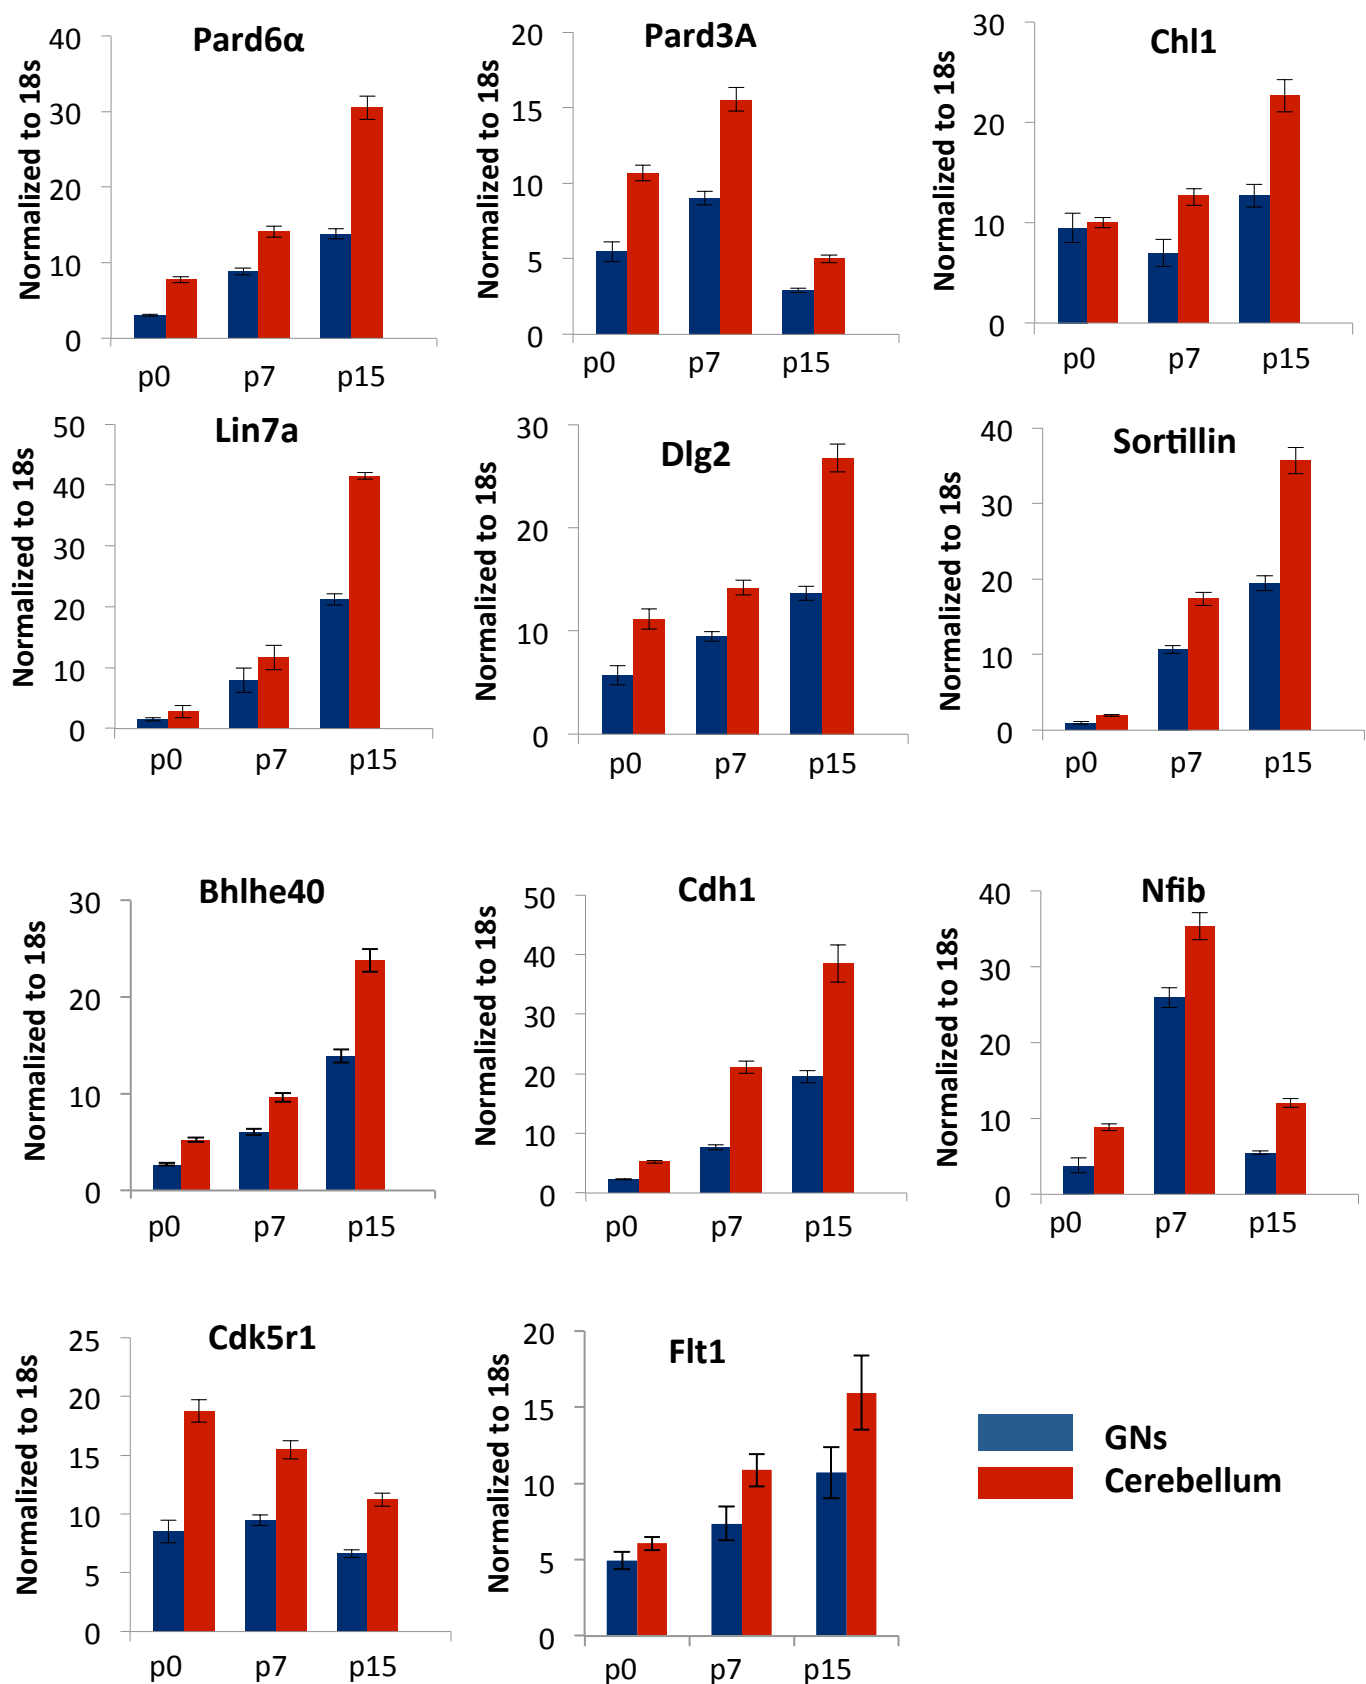

Singh et al. Figure 3 Supplement 3

Supplement: supp [file elife-12717-supp-v1.zip]

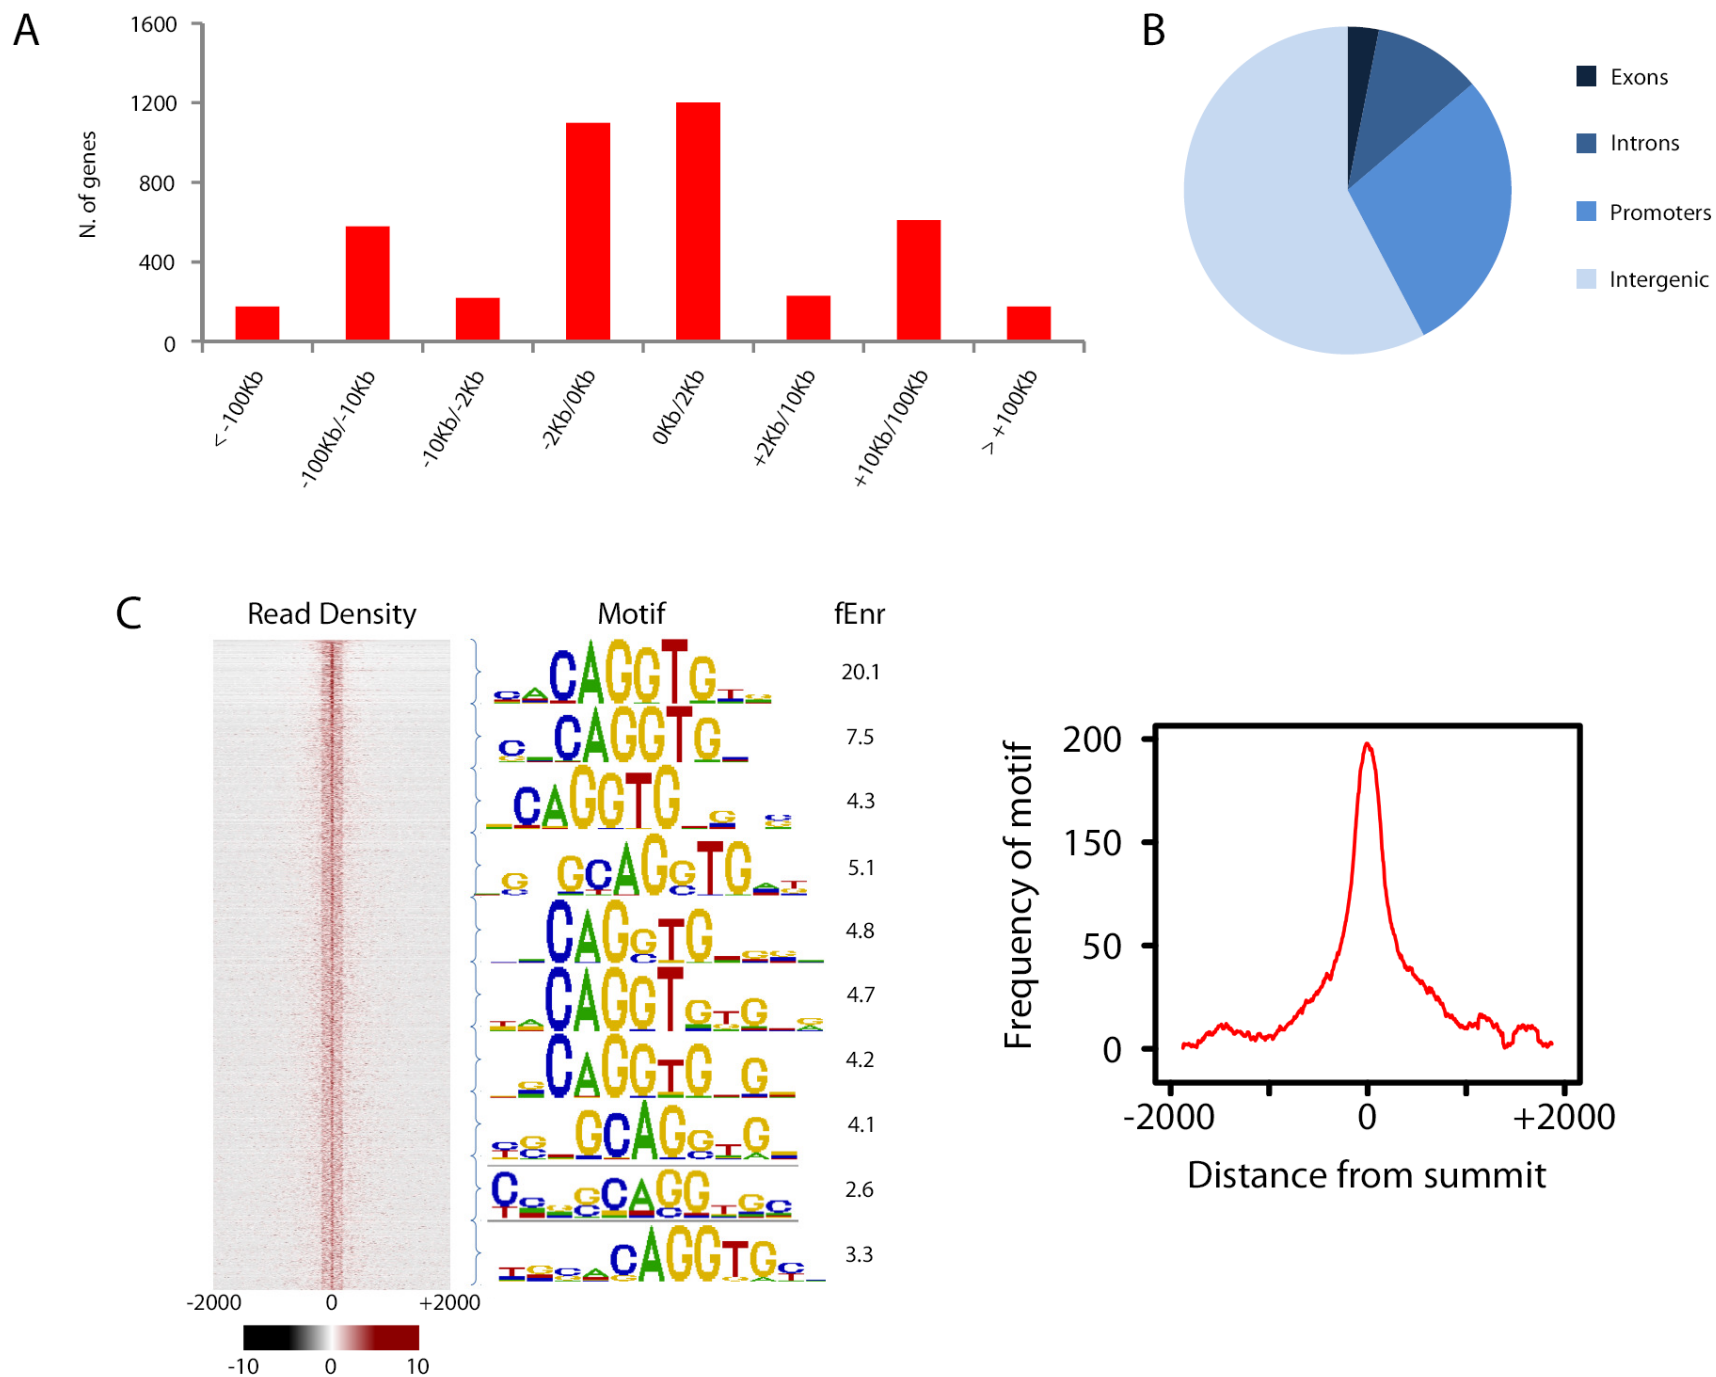

**Singh et al. Figure 4 Supplement 1**

Supplement: supp [file elife-12717-supp-v1.zip]

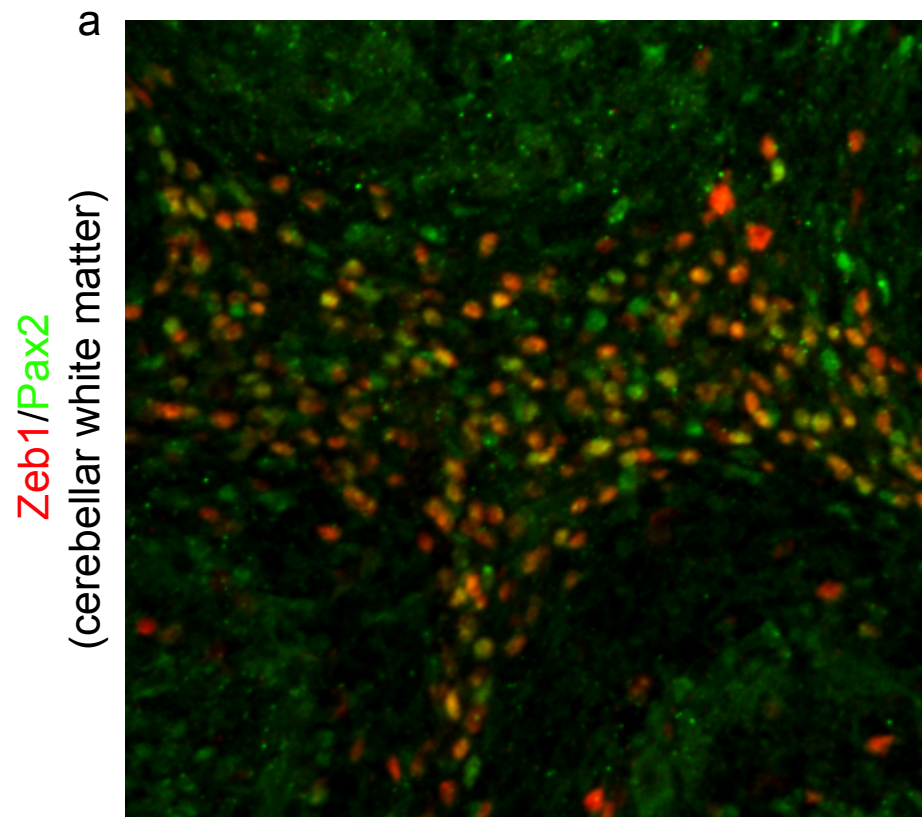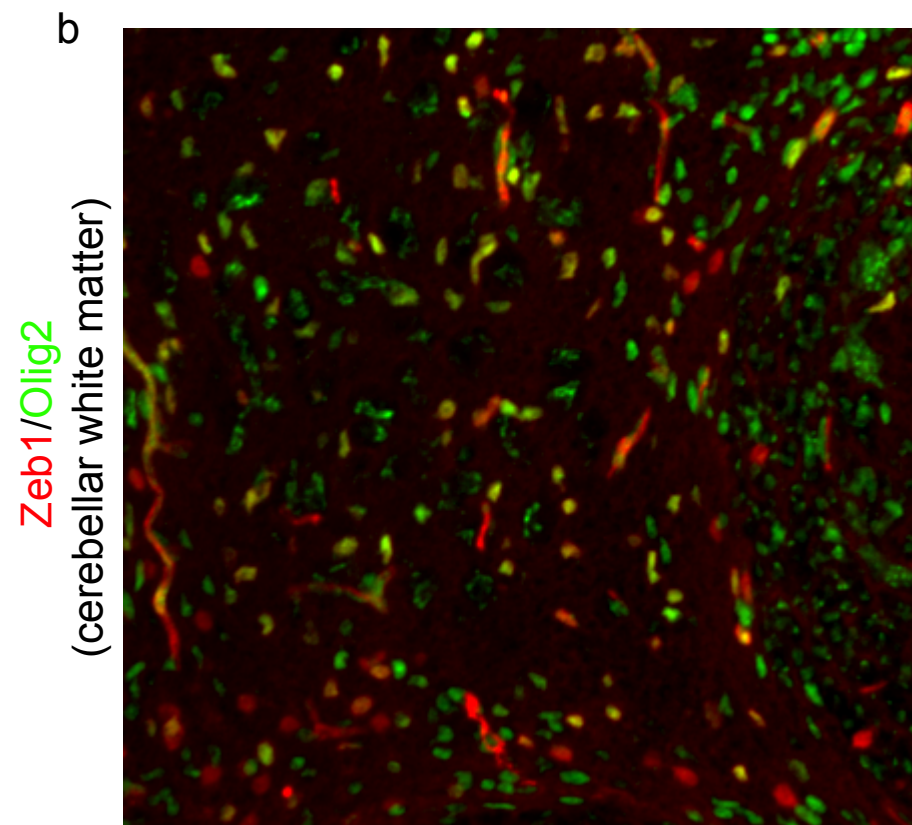

Supplement: supp [file elife-12717-supp-v1.zip]

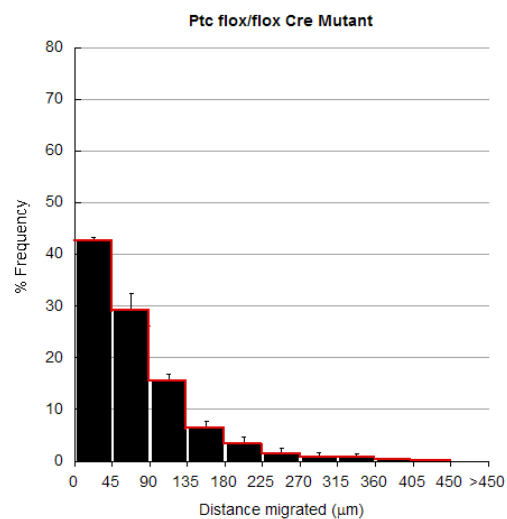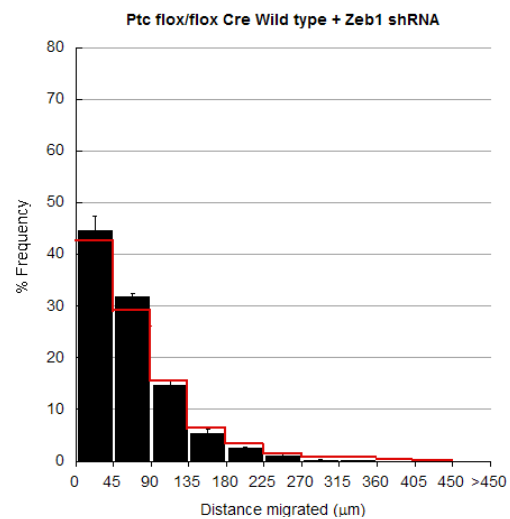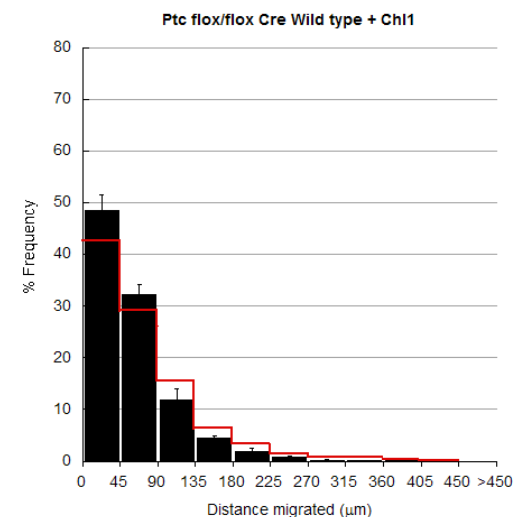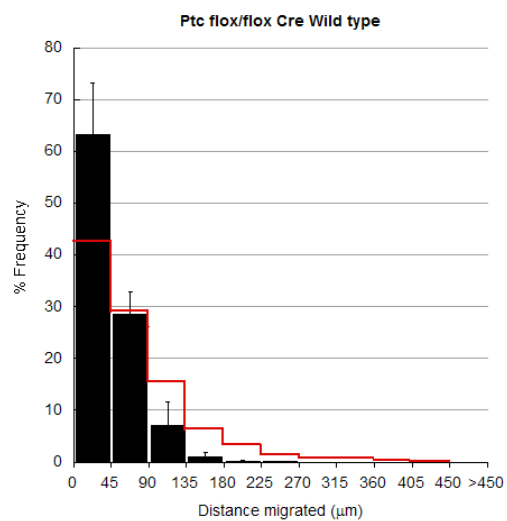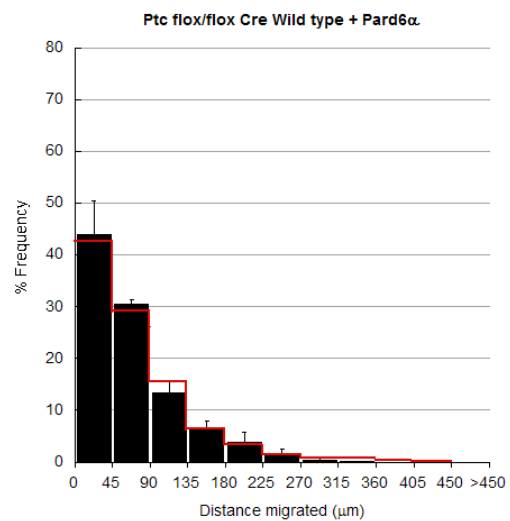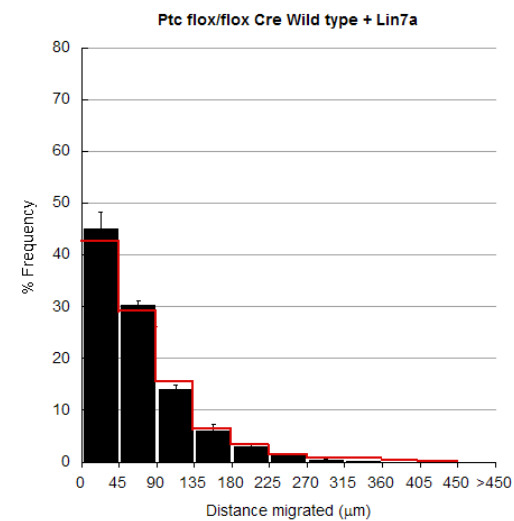

Singh et al. Figure 8 Supplement 1

Supplement: supp [file elife-12717-supp-v1.zip]

a

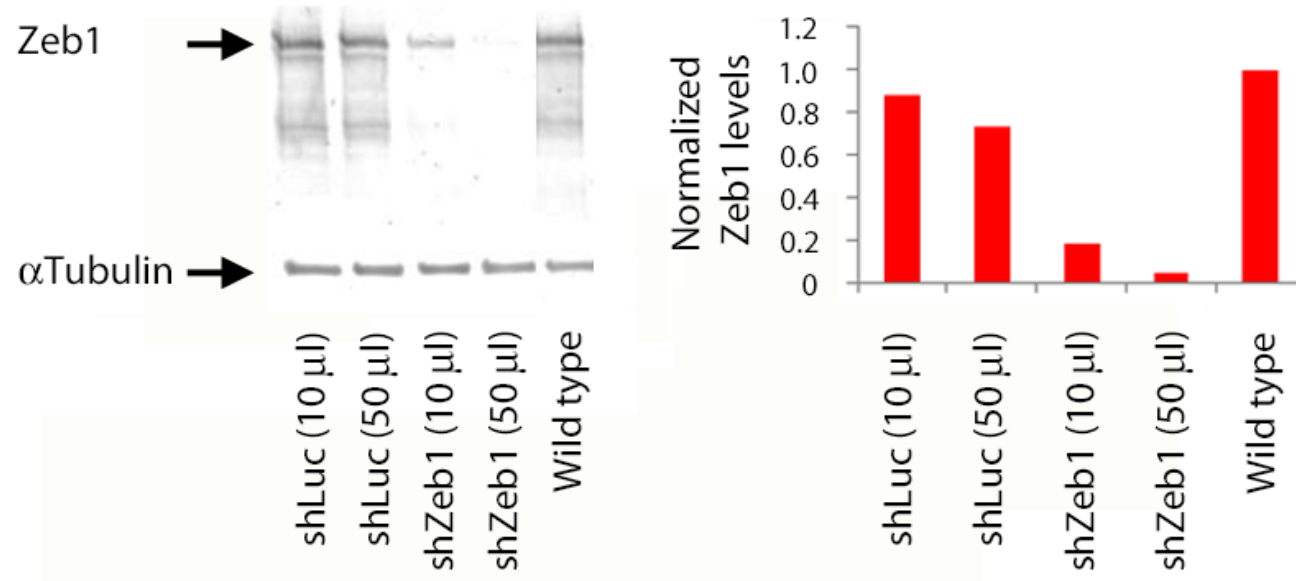

b

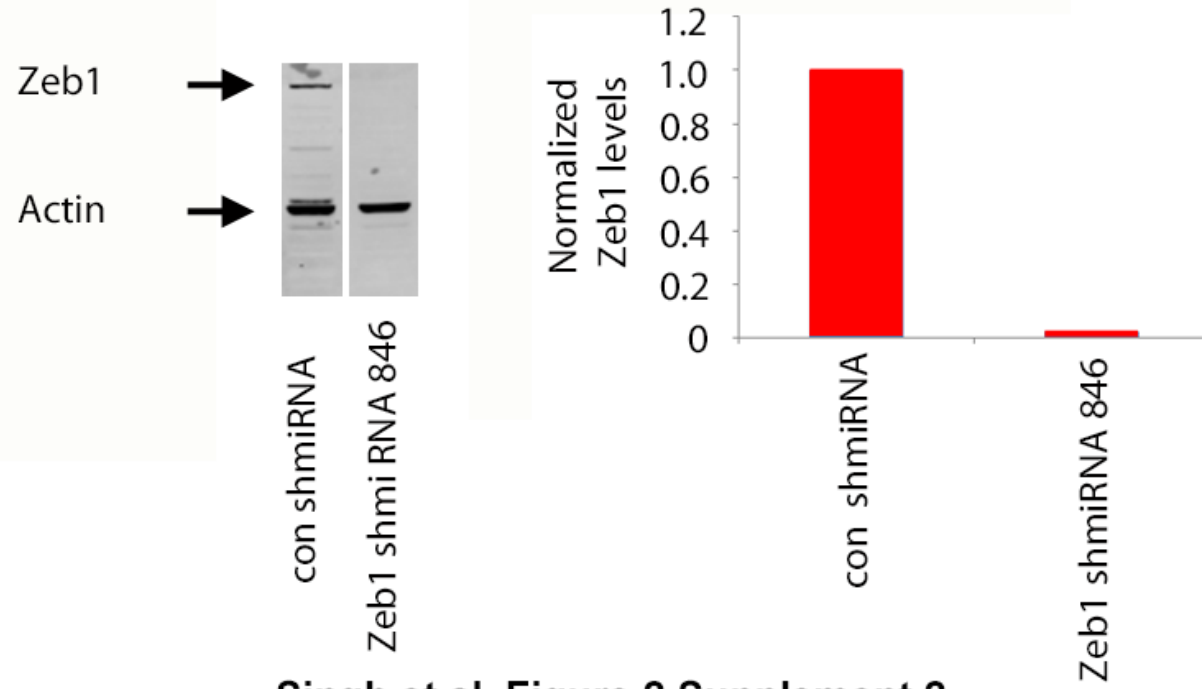

Supplement: supp [file elife-12717-supp-v1.zip]

A

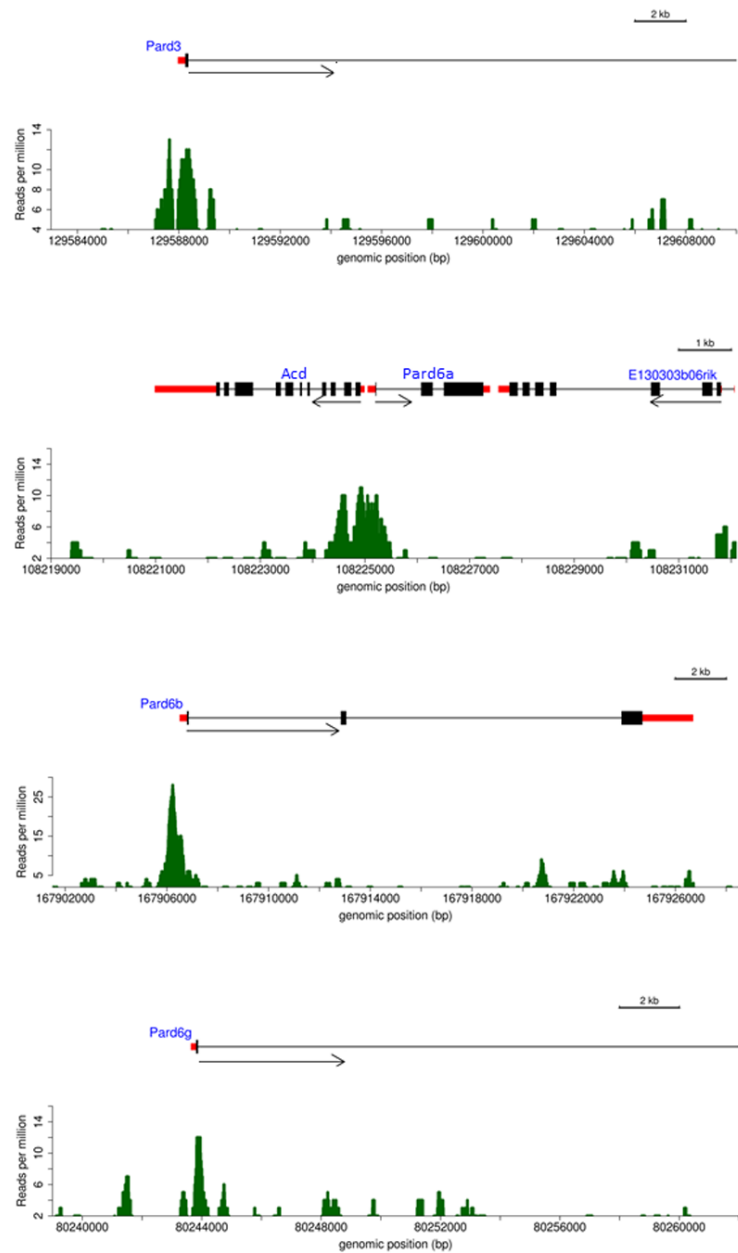

B

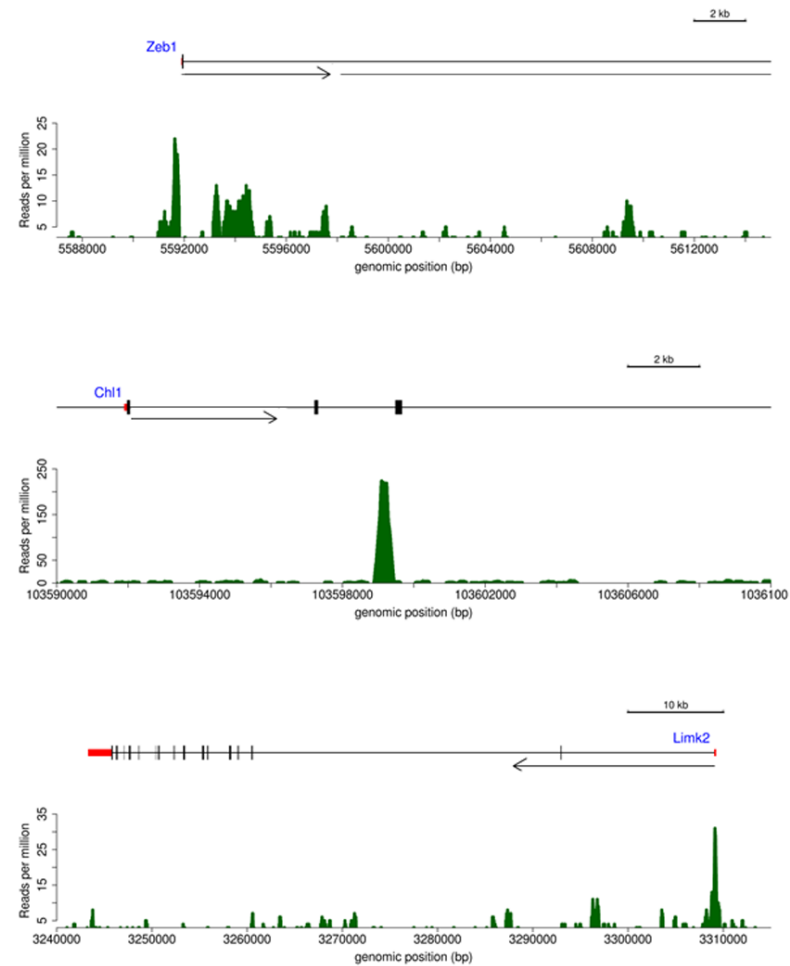

Singh et al. Figure 4 Supplement 2

Supplement: supp [file elife-12717-supp-v1.zip]

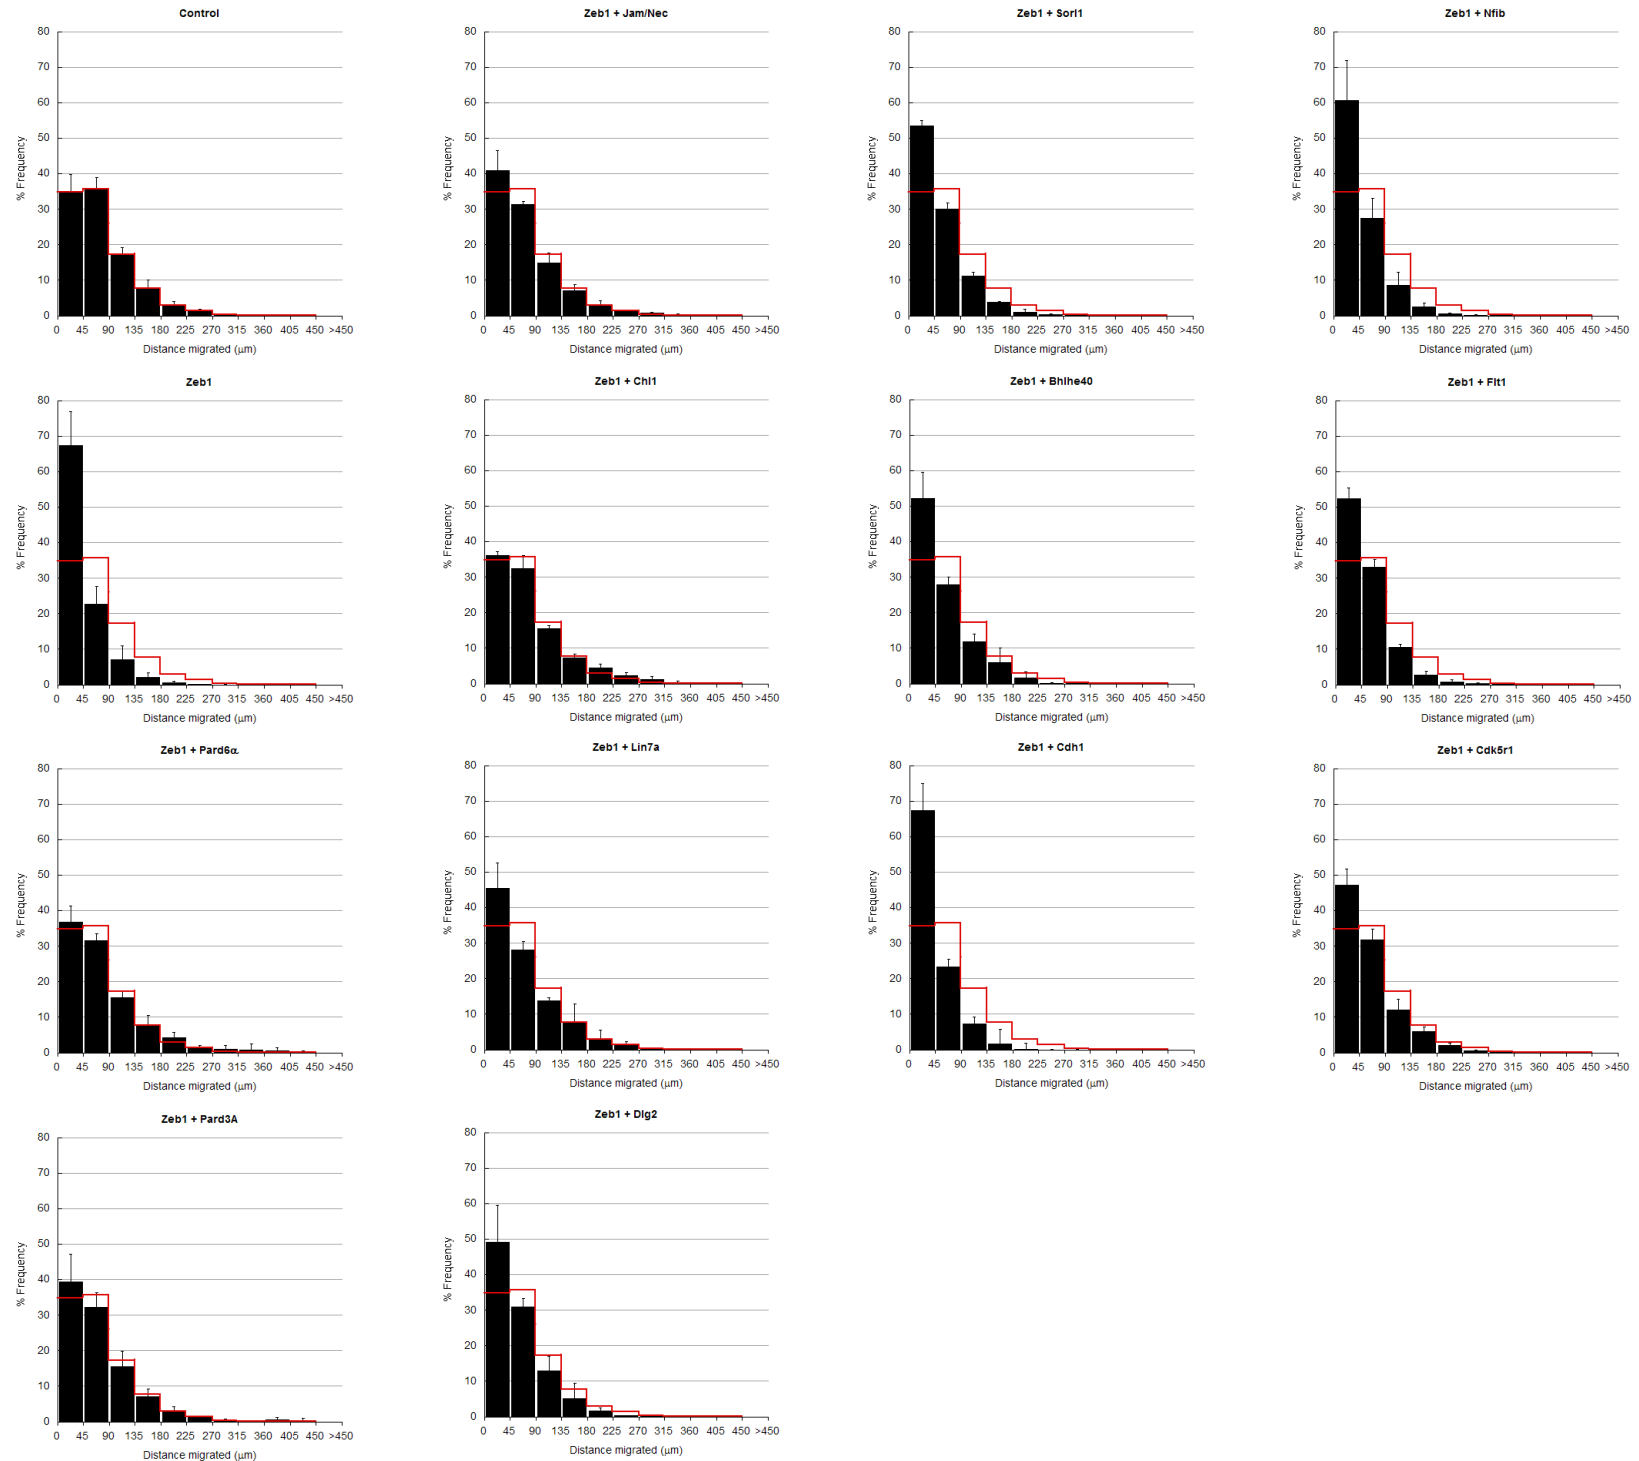

Singh et al. Figure 6 Supplement 1

Supplement: supp [file elife-12717-supp-v1.zip]

# 72 hours

## Control

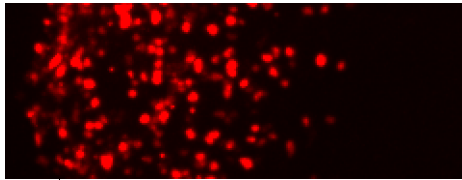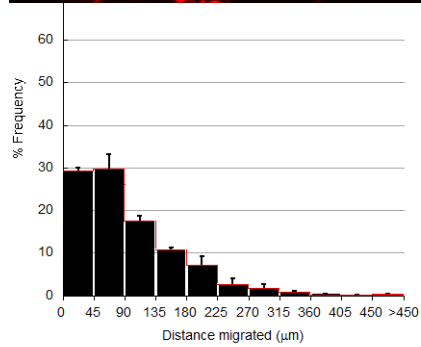

## Zeb1

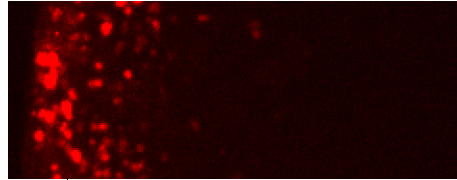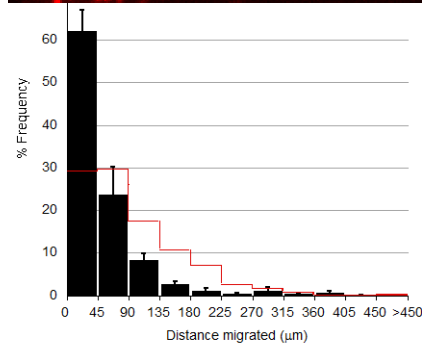

## Zeb1 + Bhlhe40

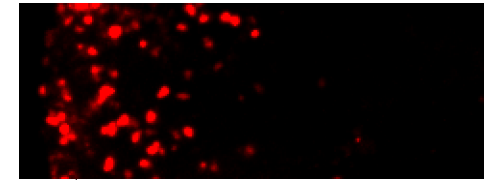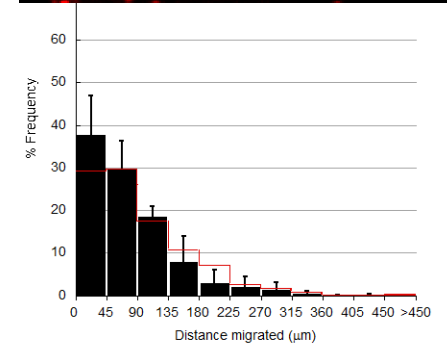

## Zeb1 + Cdh1

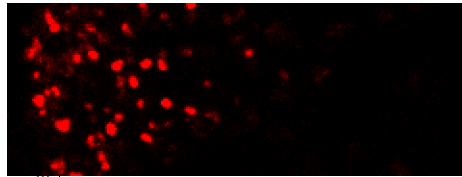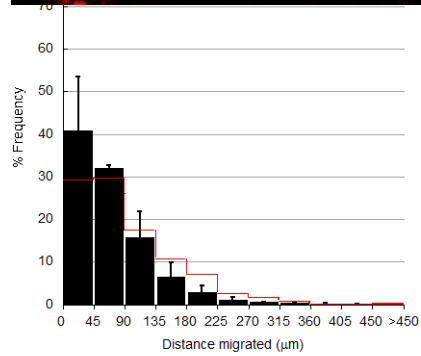

## Zeb1 + Cdk5r1

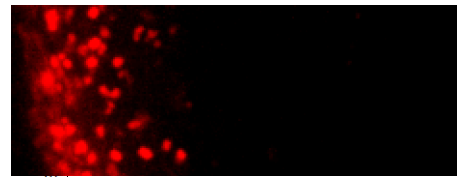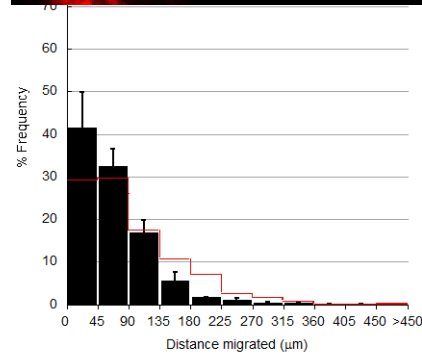

## Zeb1 + Sorl1

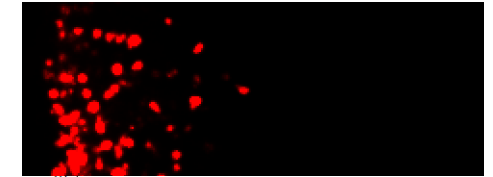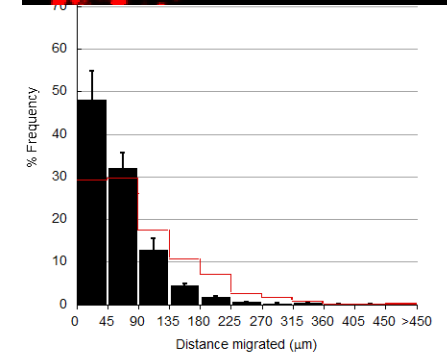

Supplement: supp [file elife-12717-supp-v1.zip]

## PCA Mapping of Cell Types

- glial cell
- gnp postnatal day 0
- gnp postnatal day 15
- gnp postnatal day 7

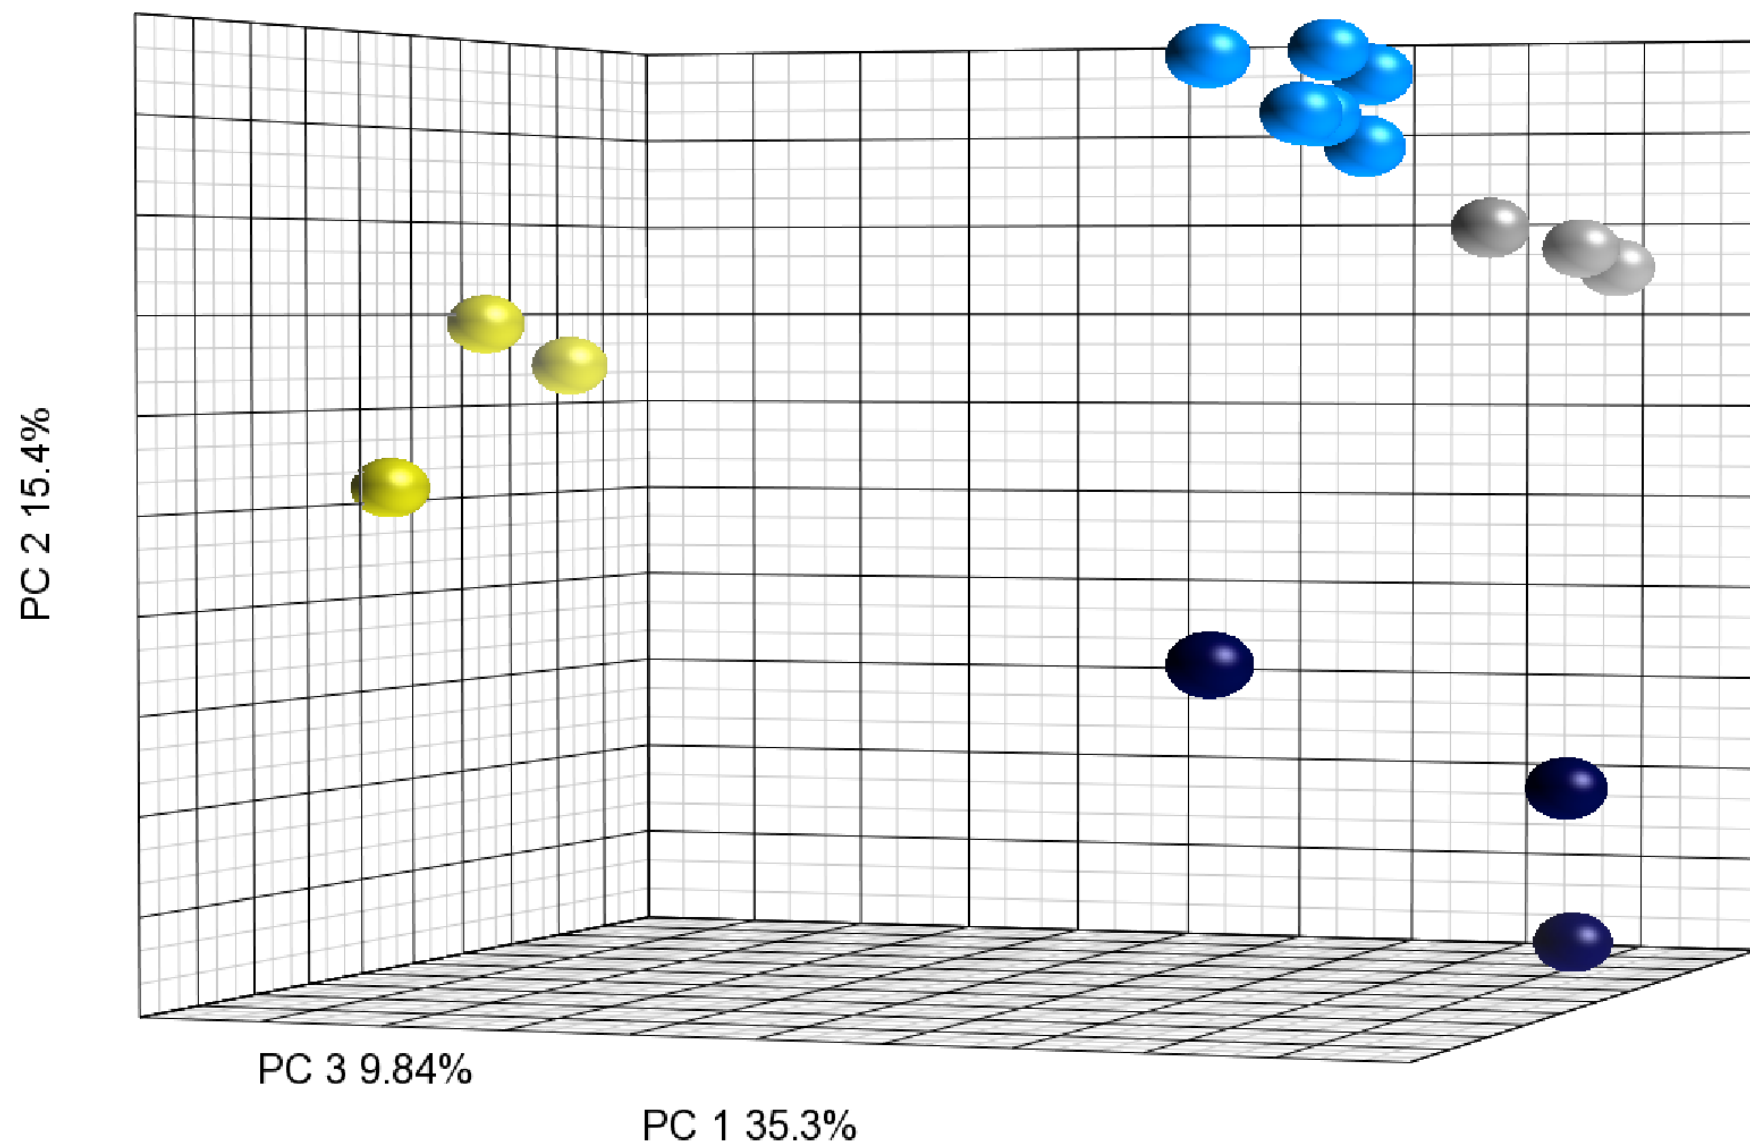

Supplement: supp [file elife-12717-supp-v1.zip]

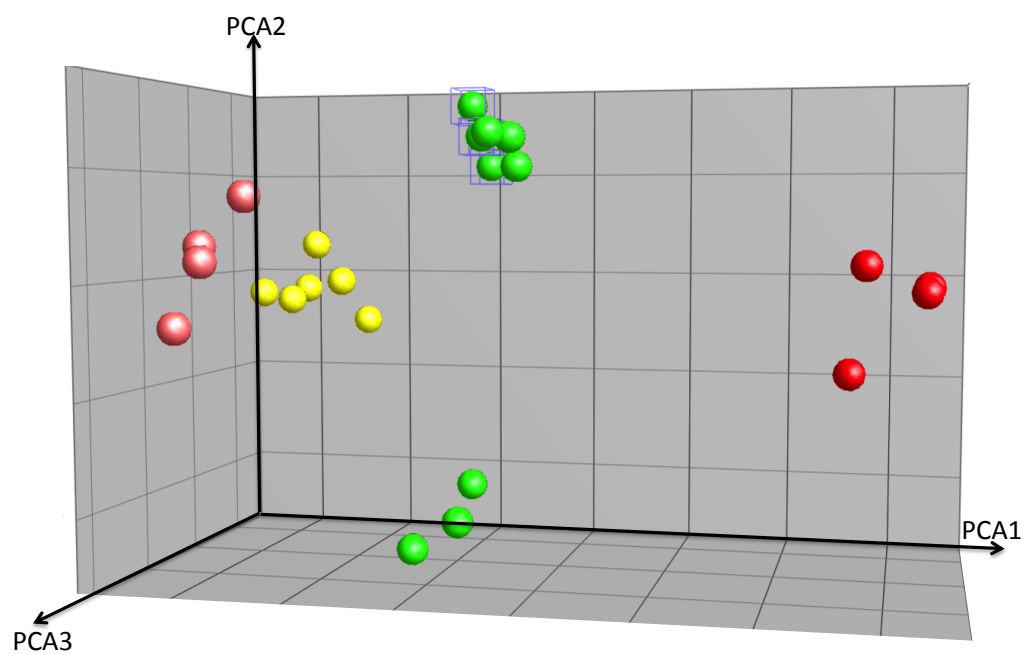

Supplement: supp [file elife-12717-supp-v1.zip]
